# Supplementary material for: Immunopeptidomic Profiling of HLA‐A2‐Positive Triple Negative Breast Cancer Identifies Potential Immunotherapy Target Antigens
Source: PubMed Central journal article supplement (PMC6032843; doi:10.1002/pmic.201700465), 2018-06-27

# PROTEOMICS

**Supporting Information**

**for Proteomics**

**DOI 10.1002/pmic.201700465**

Nicola Ternette, Marloes J. M. Olde Nordkamp, Julius Müller,  
Amanda P. Anderson, Annalisa Nicastrì, Adrian V. S. Hill, Benedikt M. Kessler  
and Demin Li

**Immuno-peptidomic Profiling of HLA-A2-Positive Triple Negative Breast Cancer  
Identifies Potential Immunotherapy Target Antigens**

Supporting Information Figure S1

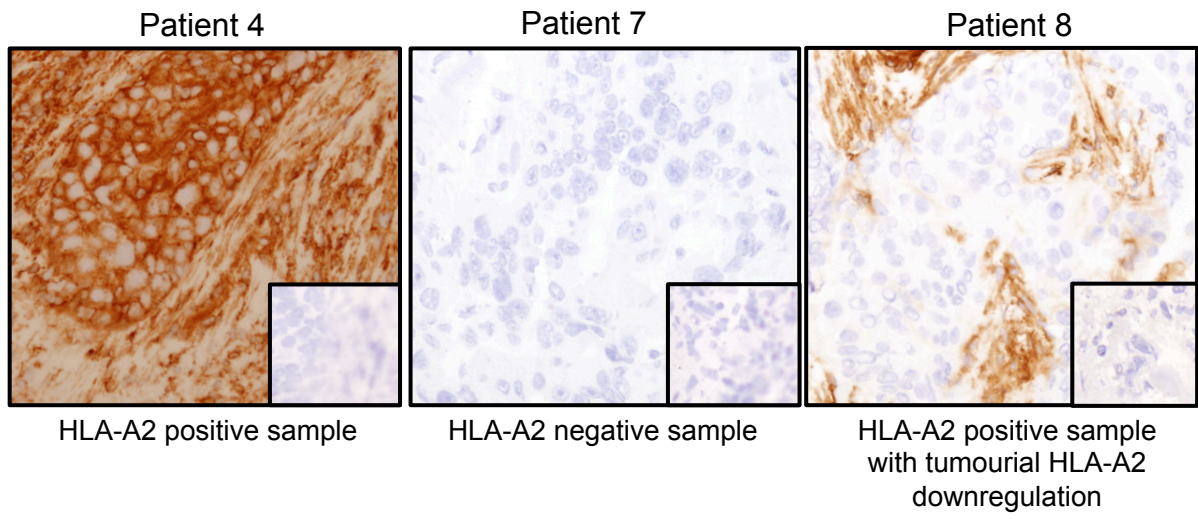

# Supporting Information Figure S2

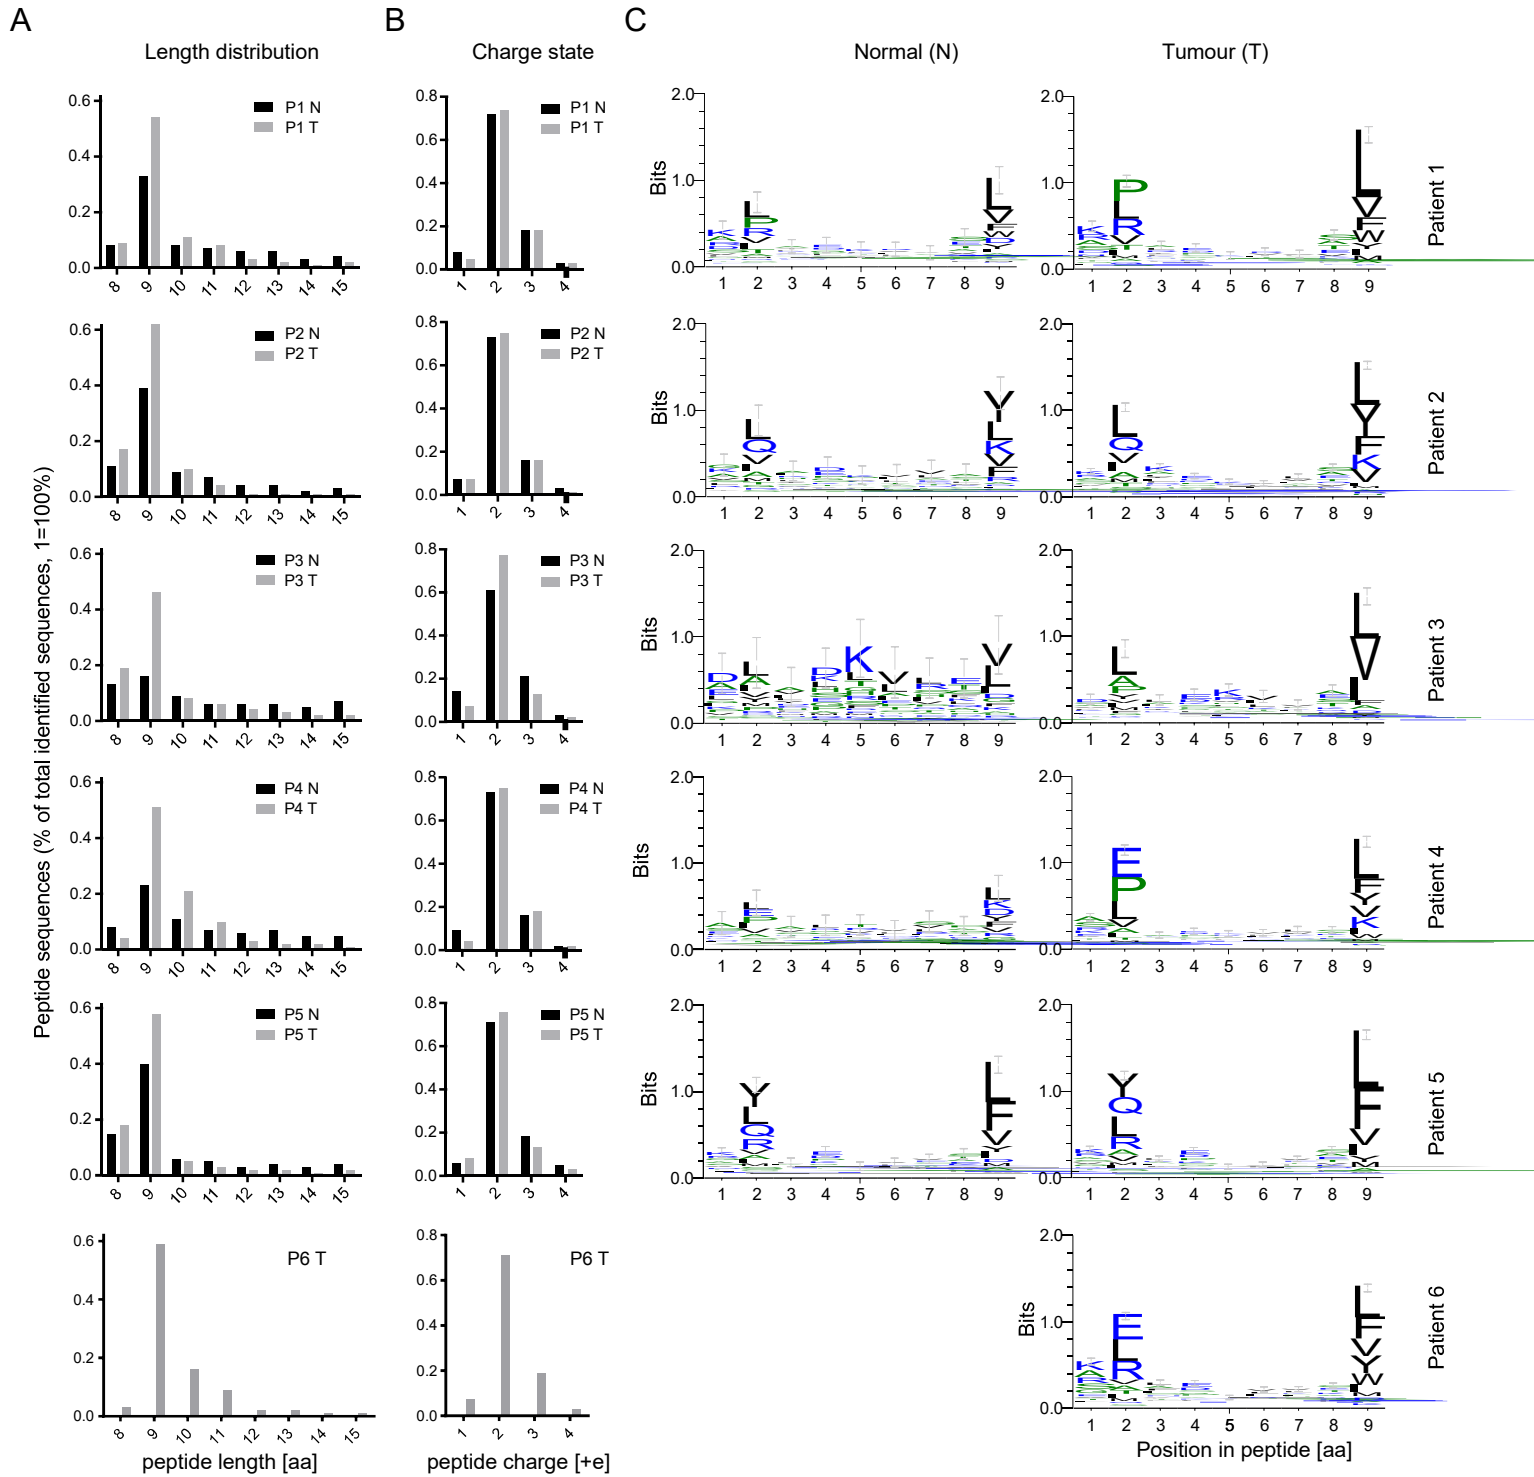

# Supporting Information Figure S3

A

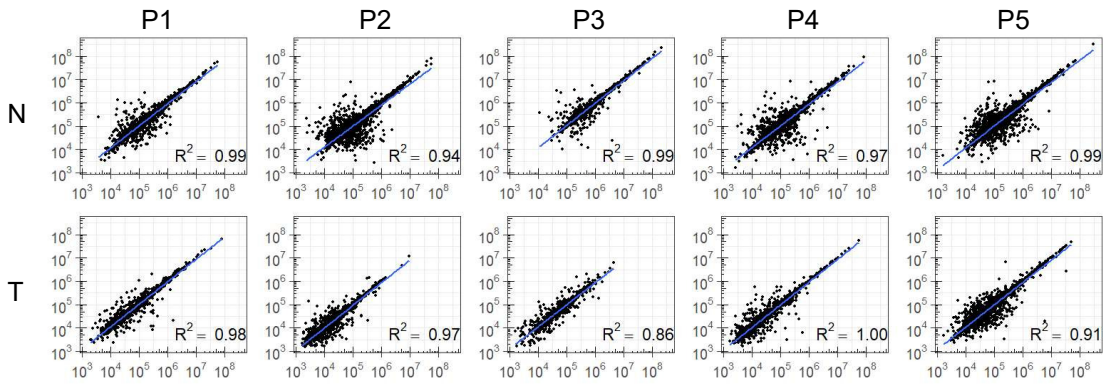

B

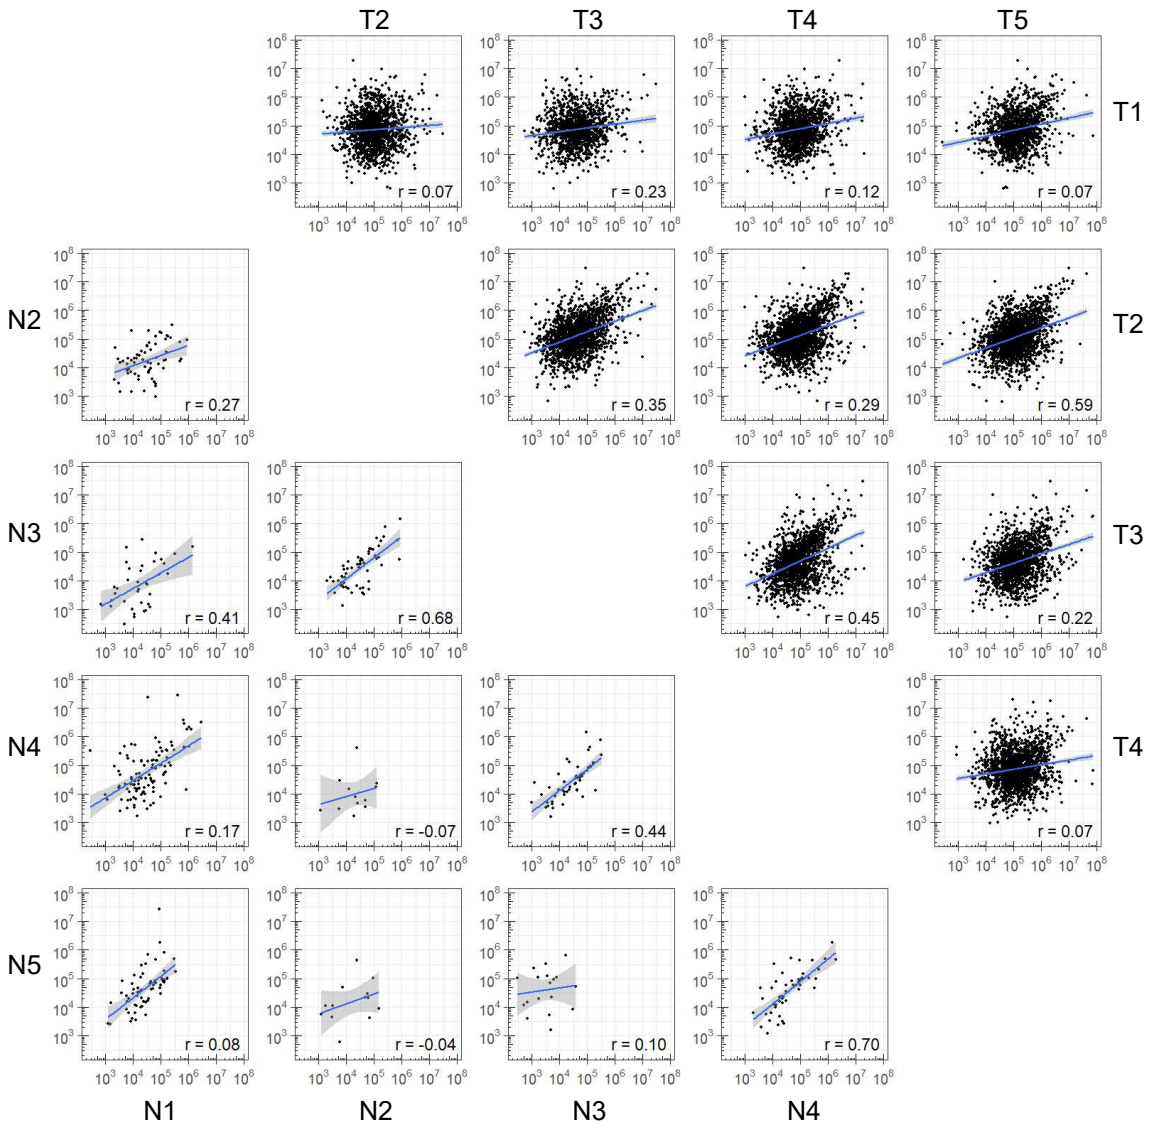



## Supporting Information Figure S5

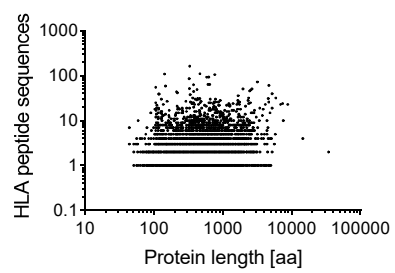



# Supporting Information Figure S6

A

**CFL-1**

1 M**ASGVAVSDG VIKVFN**DMKV RK**STP**EEVK KRKKAFLCL SEDK**NI**LK**EGK**ELLVGDV GQTVDDPYAT FVRLPKDKC

81 RYALYD**ATYE** TRESK**EDLV** FIFWAPESAP LKS**MIYASS KO**AIK**IK**MLTG IKHQLQANCY EEVKORCTLA EKLGG**SAVIS**

161 **LEGKPL**

**IL-32**

1 MCFPKVLS**DD MKKIKAR**MM LL**TS**AQGLG AWVSACD**TD** TVGHG**LPRD** KDPALWC**QC** L**S****SO**Q**AI**TER **F**YDKM**QNA**BS

81 GRG**QV**MS**SI**A **E**LE**DD**F**KE**GY L**ET**VAA**MYE** **Q**HE**PE**L**L**LE KERDGL**CRG** NRS**VP**VD**ED** PATER**GE**S**F** C**L****KV**MS**W**Q**A**

161 M**L**QRL**Q**TW**H** **G**V**L**AW**V**KE**V** **V**AL**V**HA**V**Q**AL** **W**K**Q**P**S**FC**S** L**S**EL**PM**SS**FQ** **S****Y****C**A**P**R**GD**KE **E**L**T**FP**Q**K**S**E**P** **Q**SS**K**

**PCNA**

1 MFEA**RLV**GS **I**L**K**V**L**E**L**A**L** **D**L**I**NE**A**C**WD**I **S**S**S**OV**L**Q**S**M **D**S**S**W**S**LV**QL** **T**LR**S**E**G**F**DT** **R**CD**N**LA**M**GV **N**L**T**S**R**K**I**L**K**

81 C**A**GN**E**DI**L**T **R**A**E**NA**D**O**T**L**A** **L**V**F**E**A**P**N**Q**E**K **V**S**D**E**M****K**I**O** **L**O**V**E**L**O**G**I**P**E **Q**E**S****C****V**W**K**Q **S**E**G**E**A**R**I**C**R**D **L**S**H**I**G**D**A**V**I**

161 S**C**A**R**D**G**V**K**F**S** **A**S**G**E**L**G**N**G**I** **K**L**S**O**T**S**N**V**D**K **E**E**E**A**V**I**E**M**N** **E**P**V**O**L**T**F**A**L**R **Y**L**N**F**F**T**A****T****P** **L**S**S**T**V**L**S**M**S** **A**D**V**E**L**V**E**Y**K**

241 I**A**D**M**G**H**L**K**Y**Y** **L**A**P**K**I**E**D**E**E**G **S**

**Syntenin-1**

1 M**S**L**Y**P**S**E**L**E**D** **K**V**E****K**V**I**Q**A****T** **A**F**S**A**N**P**A**N**P**A **I**L**S**E**A**S**A**P**I**P **H**D**G**N**L****Y****R**L**Y** **P**E**L****S**O**Y****S**L**S** **L**N**E**E**E**I**R**A**N**V **A**V**S**G**A**P**L**Q**G**

81 Q**L**V**A**R**P**S**S**I**N** **Y**M**V**A**P**T**G**N**D** **V**G**I**R**R**A**E**I**K**Q **G**I**R**E**V**L**C**D**K** **Q**D**G**K**I**G**L**R**L**K **S**I**D**N**G**I**F**V**Q**L **V**Q**A**N**S**P**A**S**L**V **G**L**R**F**G**D**Q**V**L**Q

161 I**N**E**N**C**A**G**S** **S**D**K****A**R**K**V**L**Q**K** **A**F**S**E**R**I**T**M**I** **R****U****R**F**F**E**R**I**T****T** **M**H**D**S**T**G**H**V**G** **F**I**K**N**G**I**T**S **I**V**R**D**S**A**A**R**N** **G**L**T**T**E**N**I**C**E**

241 I**N**Q**N**V**I**G**L**K **D**S**Q**I**A**D**I**L**S**T **S**G**T**V**V**T**I**T**M** **P**A**F**I**F**E**H**I**K** **R**M**A**P**S**I**N****H** **S**L**M**O**H**T**I**P**E**V

**RPN-2**

1 M**A**P**P**S**S**T**V**P **L**L**A**L**T**I**A**S**T** **M**A**L**T**P**T**H**Y**L**T **K**H**D**V**E**R**L**K**A**S **L**D**R**P**T**N**L**E**S** **A**F**S**I**V**S**L**G**S** **L**G**A**Q**V**D**A**M**K** **A**C**T**Y**I**R**S**N**L**D

81 **P**S**N**V**S**D**L****Y**A **A**Q**A**S**O**A**L**S**G**C **E**I**S**I**S**N**E**T**R**D **L**L**A**A**V**S**E**D**S** **S**V**T**Q**I****H**A**V**A **A**L**S**G**L**E**P**L**A** **S**O**F**A**S**A**L**T**A** **R**L**K**E**E**T**V**L**A**

161 **T**V**Q**A**L**Q**T**A**S**H **L**S**Q**A**D**L**R**S**I** **V**E**E**I**E**D**L**V**A**R **L**D**E**L**G**G**V**I**L**Q **F**E**E**G**L**E**T**T**A**L **F**V**A**Y**T**K**L**M**D** **H**V**T**E**P**S**I**N**E** **D**O**V**I**Q**L**M**N**A**I

241 **F**S**K**K**N**F**E**S**L**S **K**A**F****S**V**A**S**A**A **V**L**S**R**N**K**V**H**V**P **V**V**V**P**E**G**S**A**S** **D**P**H**E**Q**A**I**L**R**L **Q**V**T**N**V**L**S**Q**L** **T**Q**A**T**K**L**E**N**A** **K**S**V**A**S**A**T**V**L**

321 **Q**K**T**S**F****T**P**V**G**D** **V**F**E**L**N**F**M**N**V**K **F**S**S**G**Y**D**P**L**V** **E**V**E**G**D**N**R**Y**I**A **N**T**V**E**L**L**V**K**I**S **T**E**V**G**I**N**V**D**L** **S**T**V**E**K**D**S****I**A **P**K**T**R**V**T**P**E**A**

401 **K**A**K****G****T****F**I**A**D**S** **H**O**N**E**L**A**L**F**Q**L **V**D**V**N**T**G**A**E**L****T** **P**H**O**T**F**V**R**L**I**N **Q**K**T**Q**E**V**E**V**F** **A**E**P**D**N**K**N**V**K** **F**E**L**D**T**S**E**R**K**I **E**F**D**S**A**S**G**T**T**

481 **L**Y**L**I**G**D**A**T**L** **K**N**P**L**M**N**V**A**D** **V**V**I**K**F**E**E**E**A** **F**S**T**V**L**S**Q**N**L**F **T**P**K**Q**E**1**H**L**F** **R**E**F**E**K**R**P**P**T**V **V**S**N**T**F**A**L**L **S**P**L**L**L**F**A**L**M**

561 **I**R**I**G**A**N**V**S**N**F **T**F**A**F**S**T**I**I**F**H **L**O**H**A**A**L**G**L**M** **Y**V**V**T**Q**L**N**F **Q**T**L**K**Y**L**A**I**L**G **S**V**T**L**A****S****N** **L**A**Q**Q**A**V**R**T**A** **H**

B

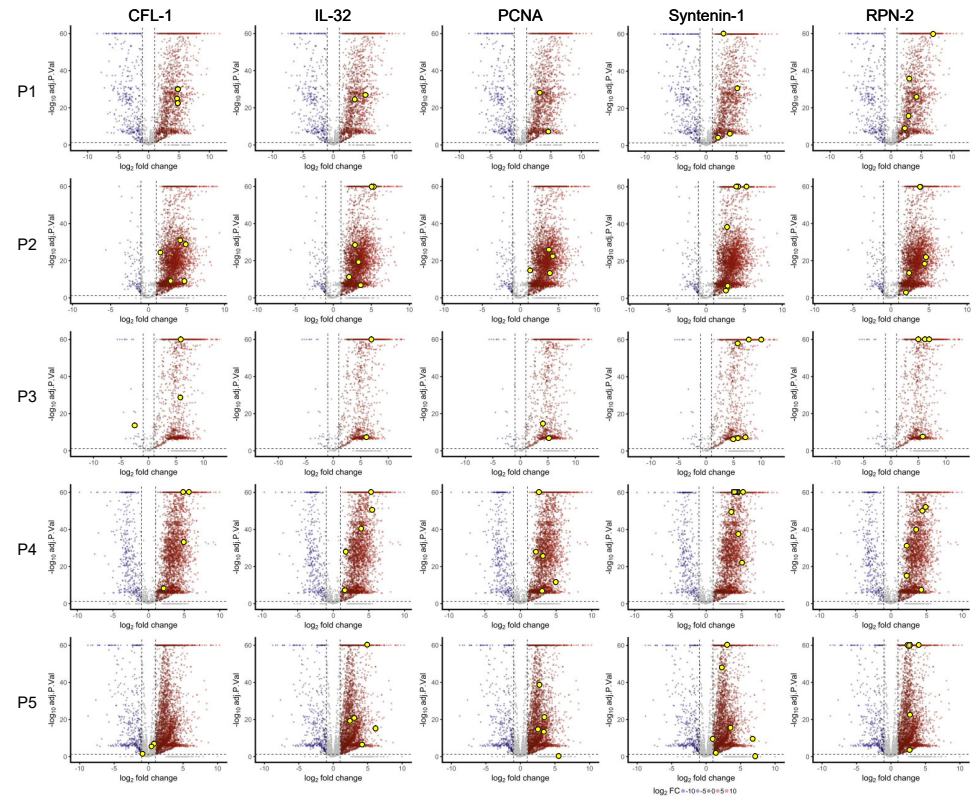

Supplement: PMIC-18-na-s001.pdf [file PMIC-18-na-s001.pdf]
